# Supplementary material for: Combining Genetic Gain and Diversity in Plant Breeding: Heritability of Root Selection in Wheat Populations
Source: MDPI journal article supplement (doi:10.3390/su132212778), 2021-11-18
Supplement: s1 [file s1]

Archive with 1 entries (1 files):
- sustainability-1428742-supplementary.pdf
