# Supplementary material for: Combining Genetic Gain and Diversity in Plant Breeding: Heritability of Root Selection in Wheat Populations
Source: MDPI journal article supplement (doi:10.3390/su132212778), 2021-11-18
Supplement: s1 [file s1 › sustainability-1428742-supplementary.pdf]

## Supplementary Files

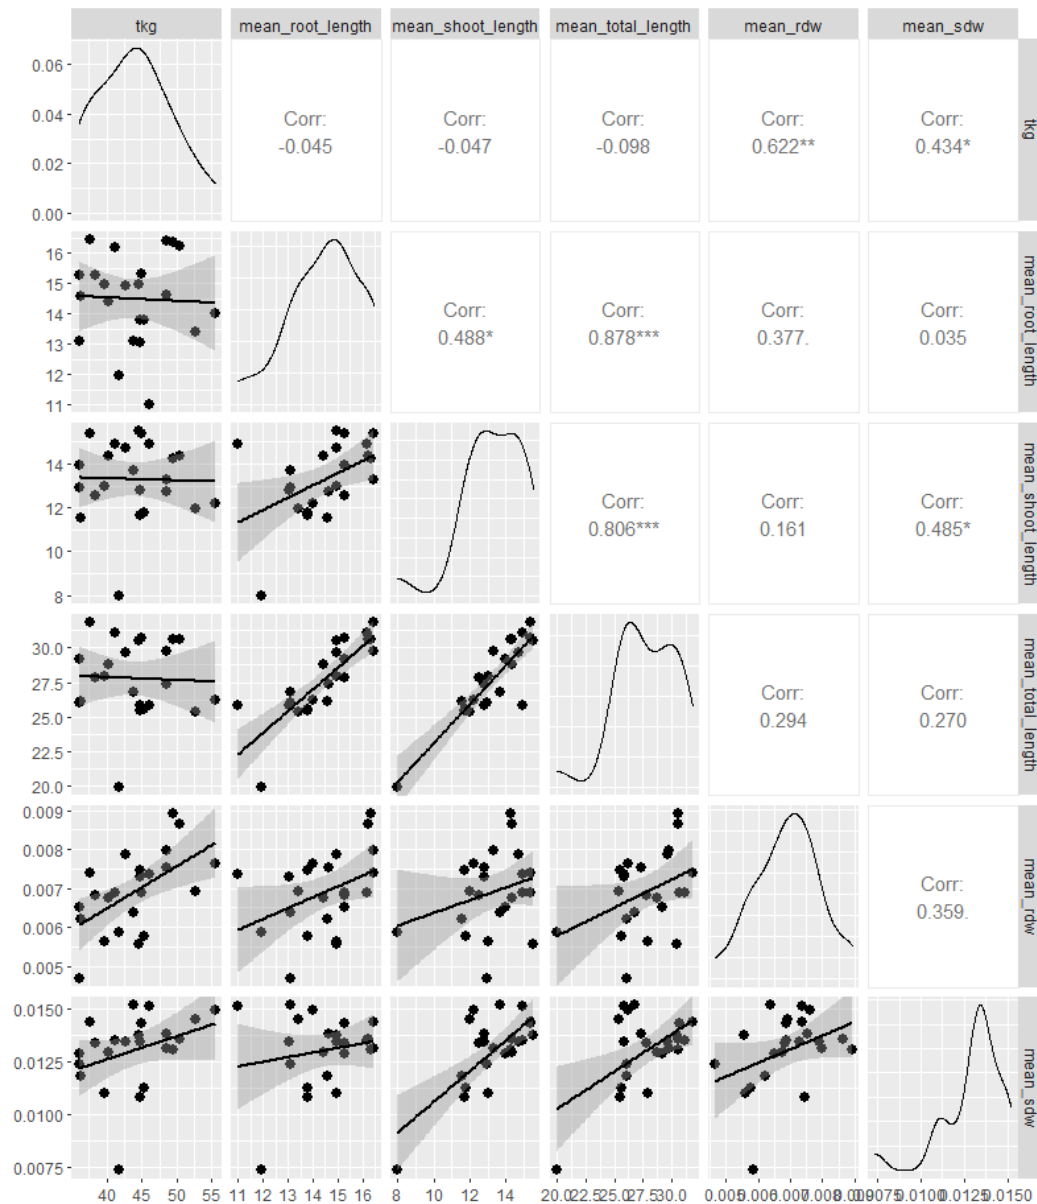

**Figure S1** Correlations for various measured traits from the hydroponic experiment. Spearman correlation for SRL and TKG. SL and SRL are averaged across replicates for each genotype. Stars significant differences at  $p < 0.0$  (\*),  $p < 0.01$  (\*\*) and  $p < 0.001$  (\*\*\*).

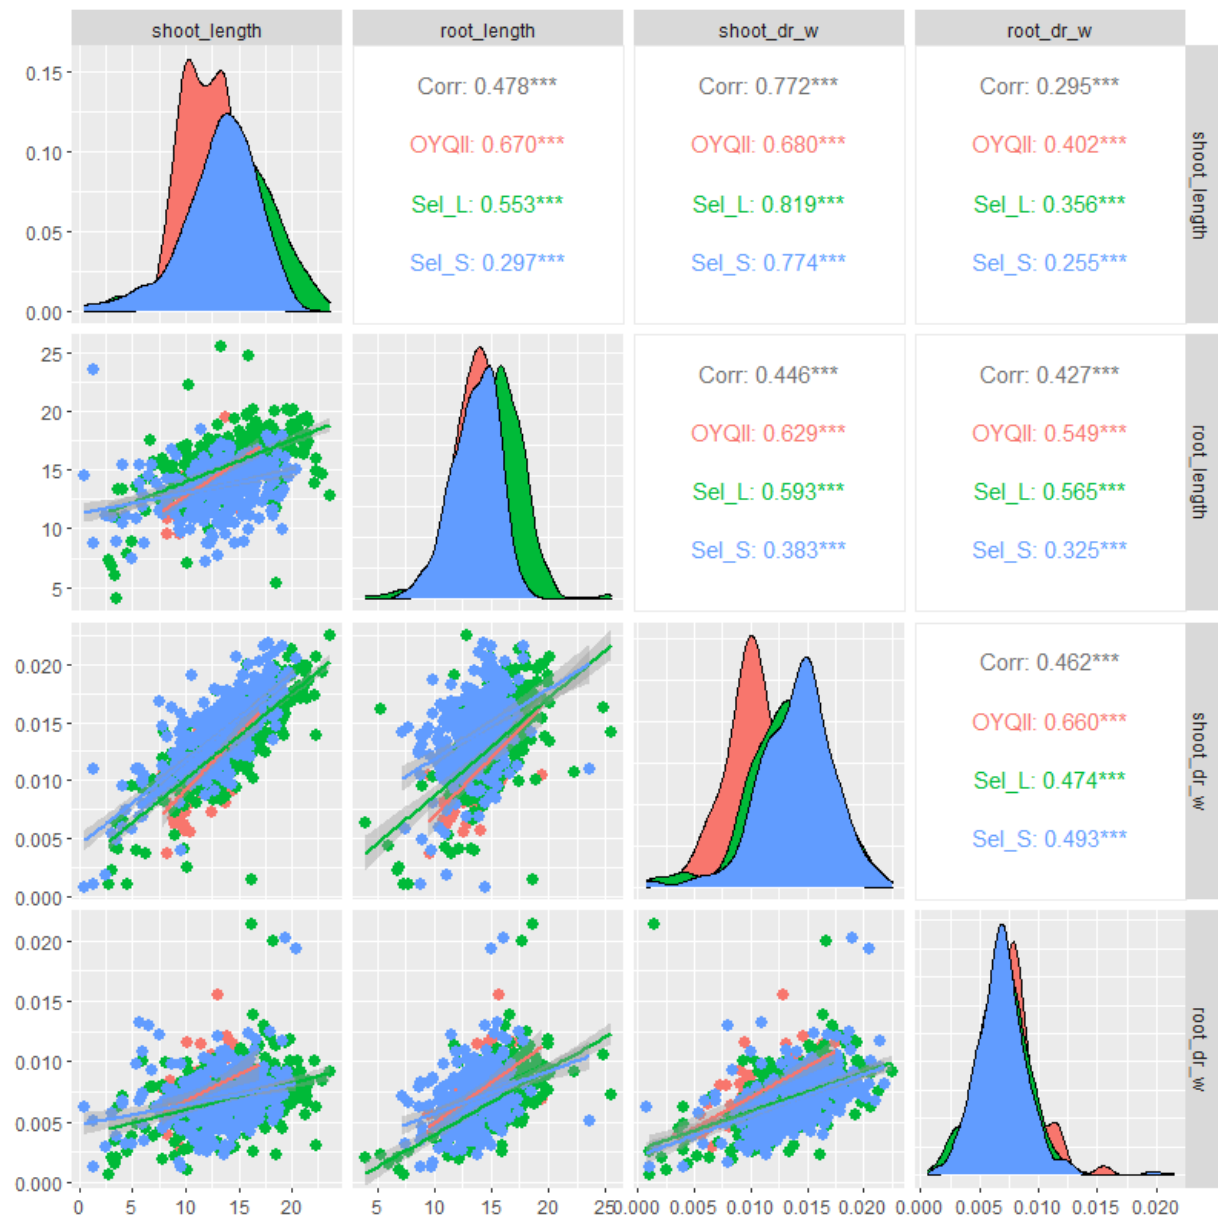

**Figure S2** Spearman correlation with individual plants for shoot and root length and dry weights in the hydroponic experiment. Stars significant differences at  $p < 0.0$  (\*),  $p < 0.01$  (\*\*) and  $p < 0.001$  (\*\*\*).

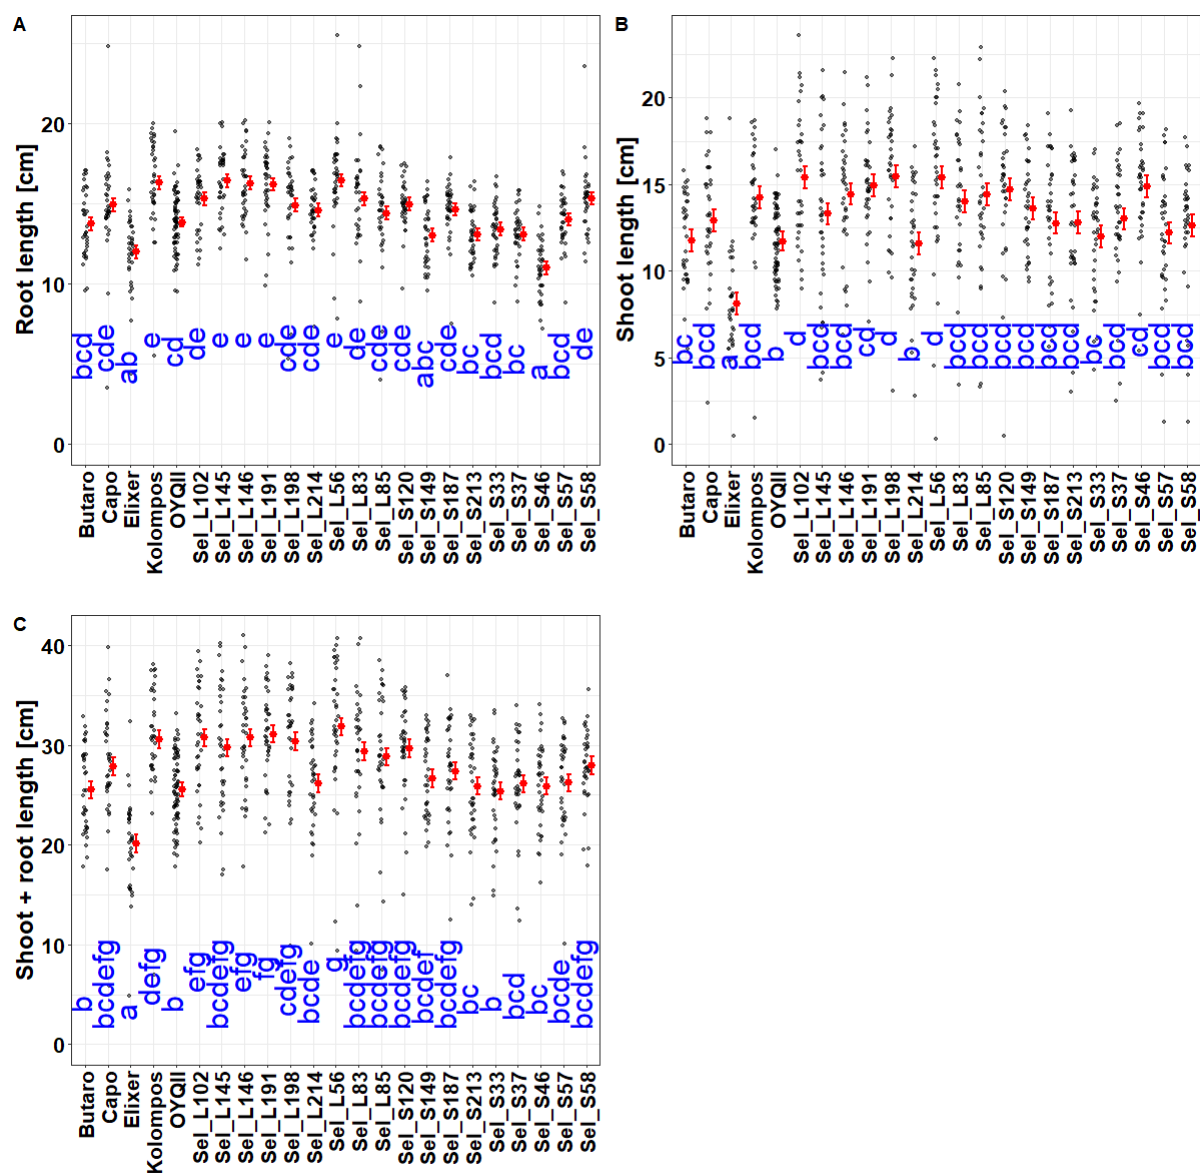

**Figure S3** Root length (A), shoot length (B) and root plus shoot length (C) for individual progenies in the hydroponic experiment. Plotted are raw data for individual lines (black dots) and estimated marginal means with standard error from linear mixed effect models (lme, red). Letters indicate significant differences at  $p < 0.05$  estimated from lmes with pairwise comparison and Holm correction. Sel\_L includes all progenies selected for long roots and Sel\_S all progenies selected for short roots.

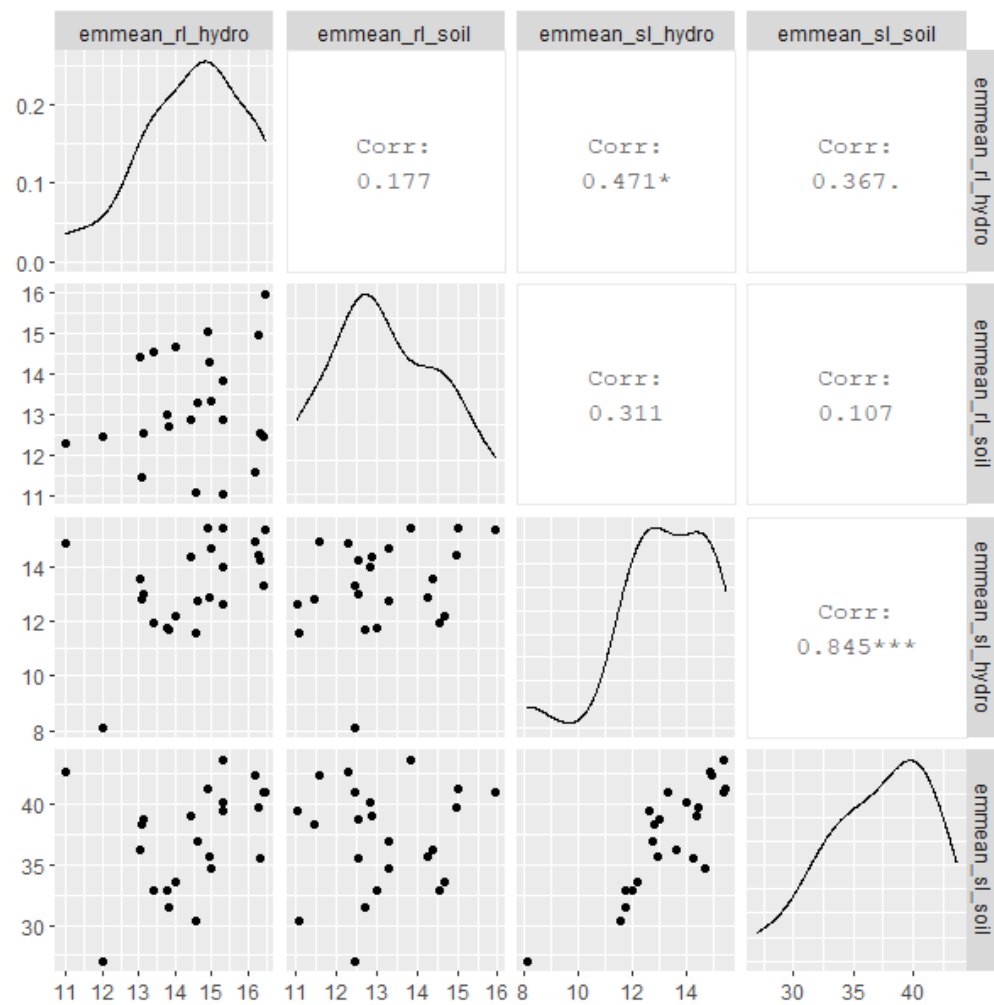

**Figure S4** Spearman correlation between traits in hydroponics and soil. Stars significant differences at  $p < 0.0$  (\*),  $p < 0.01$  (\*\*) and  $p < 0.001$  (\*\*\*).

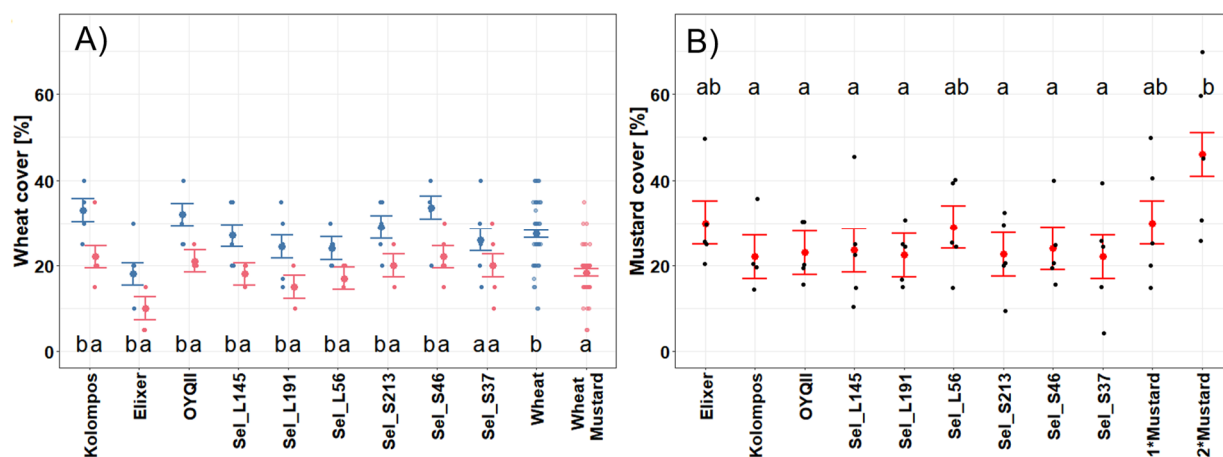

**Figure S5** Soil cover for wheat (A) and Mustard (B). Plotted are raw data (dots) and estimated marginal means with standard error from linear mixed effect models. Letters indicate significant differences at  $p < 0.05$  estimated from lmes with pairwise comparison and Holm correction. Sel\_L includes progenies selected for long roots and Sel\_S progenies selected for short roots.

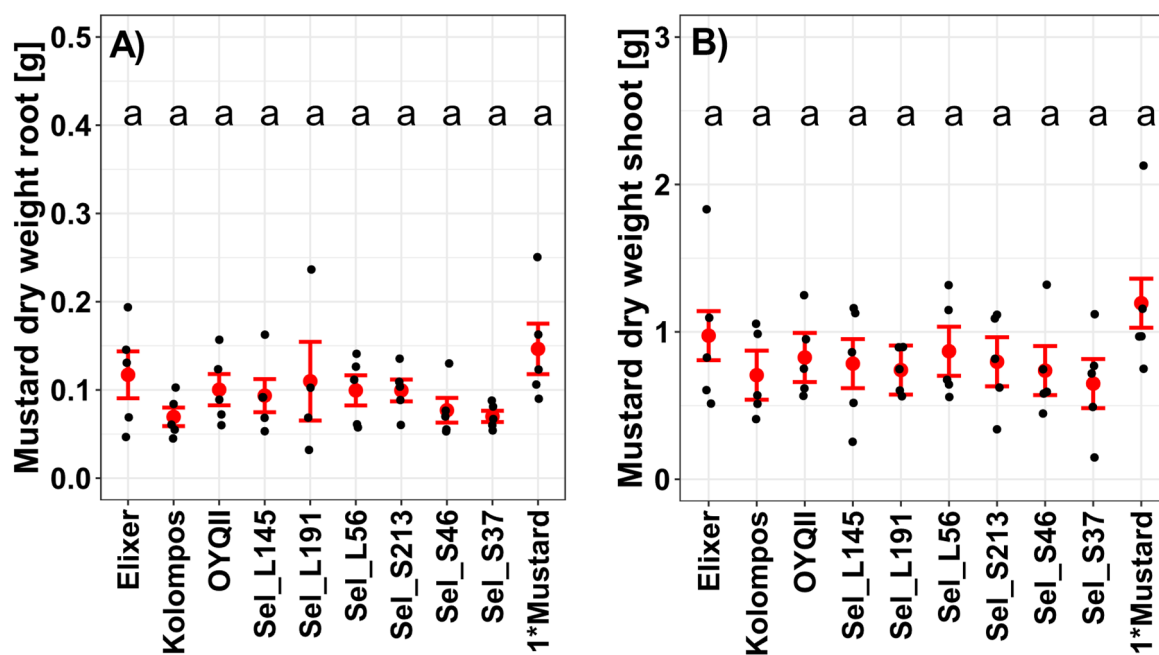

**Figure S6** Mustard root and shoot dry weight. Plotted are raw data (black dots) and estimated marginal means with standard error from linear mixed effect models (lme, red). Letters indicate significant differences at  $p < 0.05$  estimated from lmes with pairwise comparison and Holm correction. Sel\_L includes progenies selected for long roots and Sel\_S progenies selected for short roots.

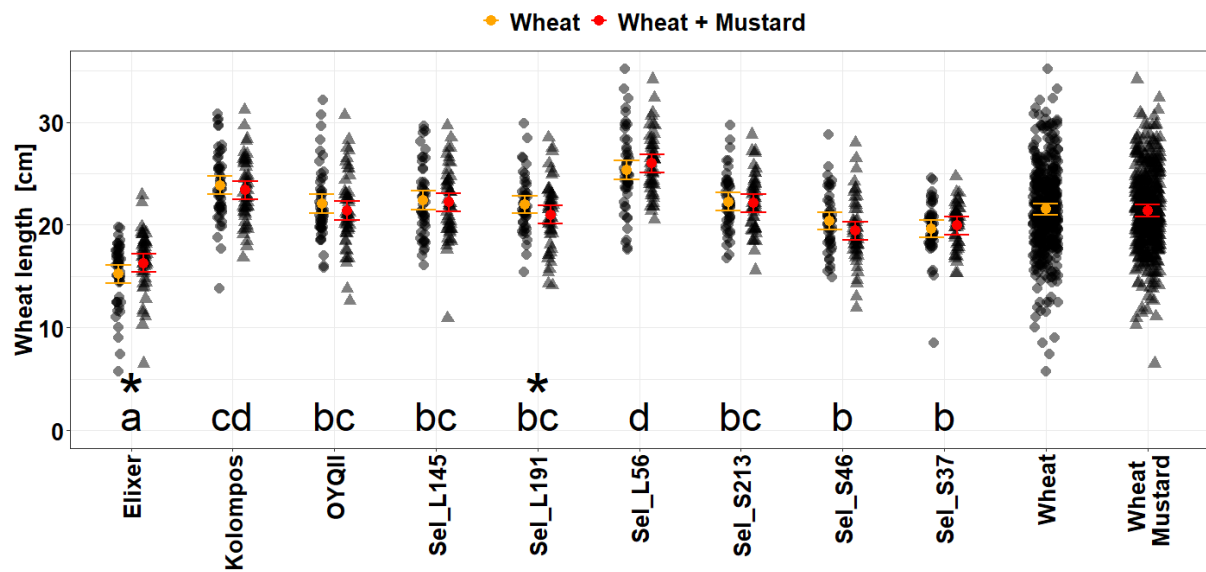

**Figure S7.** Length of six-week-old wheat plants grown either in pure stands or in the presence of mustard as a model weed. Raw data are plotted with dots for wheat monoculture and triangles for wheat in mixture with mustard, overlapping data points are black. Estimated marginal means with standard error from linear mixed effect models are orange for pure and red for mixed wheat. Different letters indicate significant differences among genotypes and stars between mixture and monoculture at  $P < 0.05$  estimated from lmes with pairwise comparison and Holm correction. Sel\_L are progenies of plants selected for long roots and Sel\_S are progenies of plants selected for short roots.

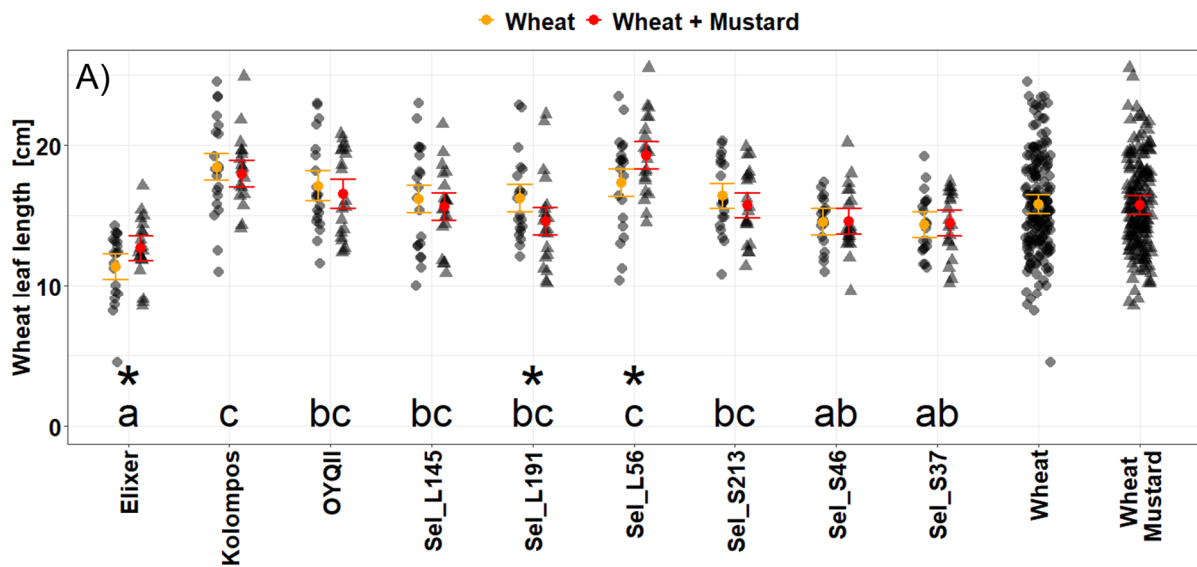

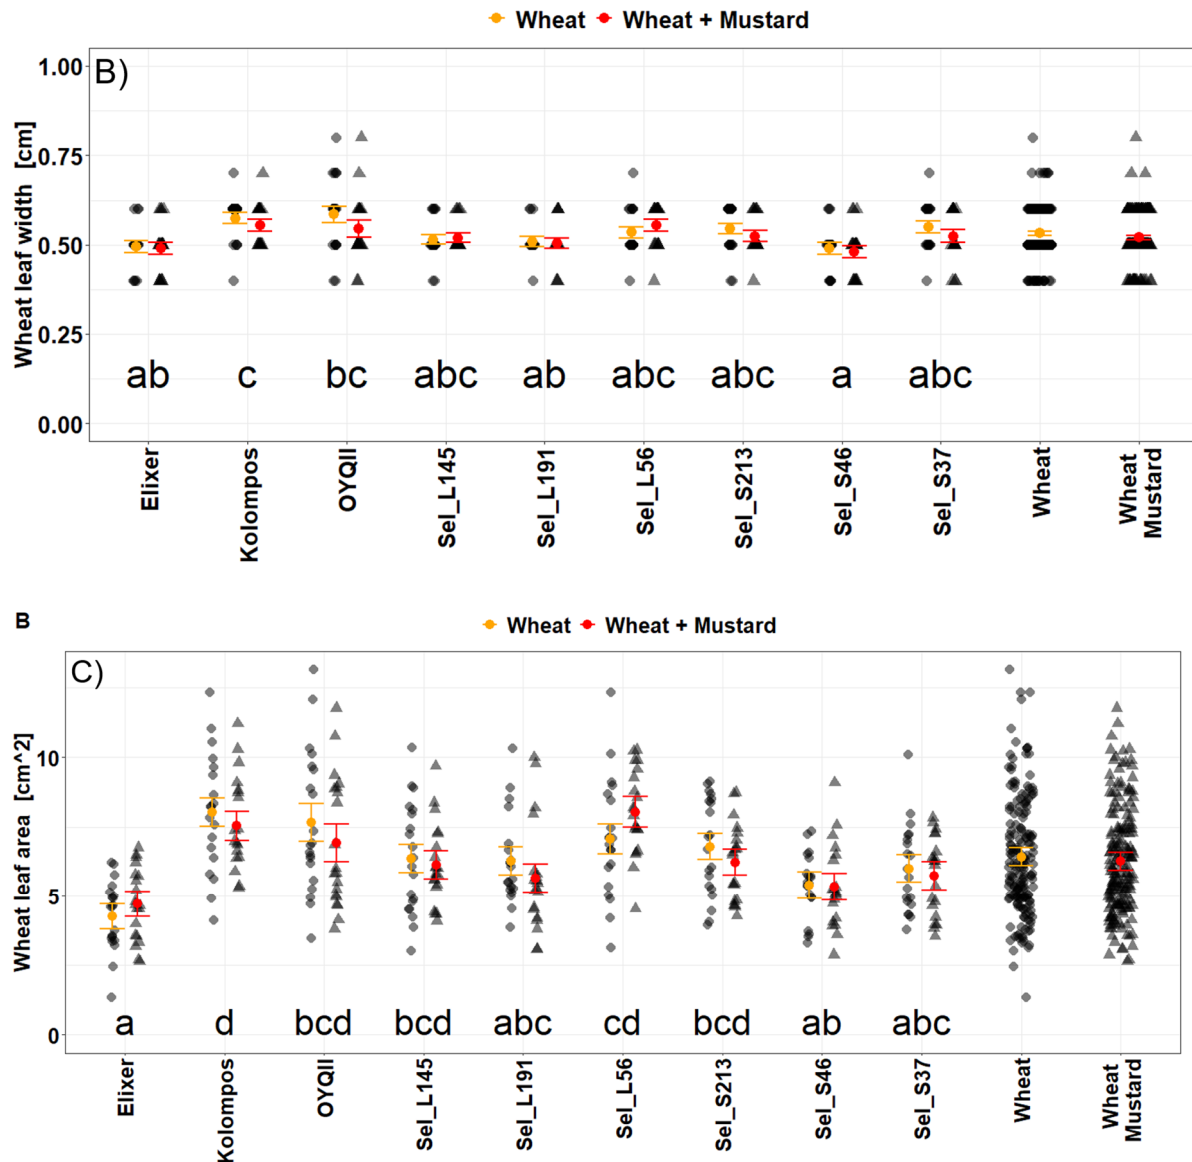

**Figure S8** Leaf length (A), leaf width (B) and leaf area (C) of six weeks old wheat plants grown either in pure stands or in the presence of mustard as a model weed. Raw data are plotted with grey dots for wheat monoculture and grey triangles for wheat in mixture with mustard and black color indicates overlapping data points. Estimated marginal means with standard error from linear mixed effect models are orange for pure and red for mixed wheat. Different letters indicate significant differences between genotypes across systems and stars between mixture and monoculture at  $p < 0.05$  estimated from lmes with pairwise comparison and Holm correction. Sel\_L are progenies of plants selected for long roots and Sel\_S are progenies of plants selected for short roots.

**Table S1** List of statistical models used. Treatment refers to the two-level treatment factor (mono wheat/wheat mixed with mustard), row refers the experimental unit including multiple measured plants and rep refers to the

| Experiment      | Response variable    | Model                                            | Weighed variances | Used R package |
|-----------------|----------------------|--------------------------------------------------|-------------------|----------------|
| Hydroponic      | Wheat root length    | response ~ genotype + box + (1 box:row)          | no                | lme4           |
| Hydroponic      | Wheat shoot length   | response ~ genotype + box + (1 box:row)          | no                | lme4           |
| Hydroponic      | Wheat total length   | response ~ genotype + box + (1 box:row)          | no                | lme4           |
| Hydroponic      | Wheat root length    | response ~ genotype_group + box + (1 box:row)    | no                | lme4           |
| Hydroponic      | Wheat shoot length   | response ~ genotype_group + box + (1 box:row)    | no                | lme4           |
| Hydroponic      | Wheat total length   | response ~ genotype_group + box + (1 box:row)    | no                | lme4           |
| Soil            |                      |                                                  |                   |                |
| Experiment Soil | Wheat RDW            | response ~ entry + (1 box)                       | no                | lme4           |
| Experiment Soil | Wheat SDW            | response ~ entry + (1 box)                       | no                | lme4           |
| Experiment Soil | Wheat RFW            | response ~ entry + (1 box)                       | no                | lme4           |
| Experiment Soil | Wheat SFW            | response ~ entry + (1 box)                       | no                | lme4           |
| Experiment Soil | Wheat root length    | response ~ entry + (1 box)                       | no                | lme4           |
| Experiment Soil | Wheat shoot length   | response ~ entry + box + (1 box:entry)           | no                | lme4           |
| Competition     | Wheat RDW            | response ~ genotype * treat + (1 rep:pot)        | no                | lme4           |
| Competition     | Wheat SDW            | response ~ genotype * treat + rep + (1 rep: pot) | no                | lme4           |
| Competition     | Wheat SFM            | response ~ genotype * treat + rep + (1 rep: pot) | no                | lme4           |
| Competition     | Wheat RFM            | response ~ genotype * treat + rep + (1 rep: pot) | no                | lme4           |
| Competition     | Mustard RDW          | response ~ genotype, random = ~1 rep             | yes               | nlme           |
| Competition     | Mustard SDW          | response ~ genotype + (1 rep)                    | no                | lme4           |
| Competition     | Mustard RFW          | response ~ genotype, random = ~1 rep             | yes               | nlme           |
| Competition     | Mustard SFW          | response ~ genotype + (1 rep)                    | no                | lme4           |
| Competition     | Wheat plant length   | response ~ treat*genotype, random = ~1 rep/ pot  | yes               | nlme           |
| Competition     | Mustard plant length | response ~ genotype + rep + (1 rep: pot)         | no                | lme4           |
| Competition     | Wheat leaf length    | response ~ treat*genotype, random = ~1 rep/ pot  | yes               | nlme           |
| Competition     | Wheat leaf width     | response ~ treat*genotype, random = ~1 rep/ pot  | yes               | nlme           |
| Competition     | Wheat leaf area      | response ~ treat*genotype, random = ~1 rep/ pot  | yes               | nlme           |

experimental replicate.
